# Supplementary material for: Large-sized fossil hamsters from the late Middle Pleistocene Locality 2 of Shanyangzhai, China, and discussion on the validity of Cricetinus and C. varians (Rodentia: Cricetidae)
Source: PeerJ. 2023 Jul 28;11:e15604. doi: 10.7717/peerj.15604 (PMC10389077; doi:10.7717/peerj.15604)
Supplement: Supplemental Information 4 — All raw data is in mm. [file peerj-11-15604-s004.xlsx]

## Sheet: Suppl. Dataset 1
Supplementary dataset 1: Measurements of skulls of Tscherskia triton varians of Syz 2 (mm)
Measured item Catalogue number	Palatal length	Upper diastema length	Length of the incisive foramen	Anterior palatal breadth	Posterior palatal breadth	Width of nasal*	Frontal suture length	Parietal suture length	Interparietal length	Interparietal width
NWUV 1489.a1				4	3.92		9.66	5.78	5.83	10.79
NWUV 1489.a2		11.24				2.3
NWUV 1489.a3		10.61	7.17	3.3	3.73	2.3
NWUV 1489.a4		10.64	7.77	3.76	4.02	1.88
NWUV 1489.a5	16.39	10.16	6.26	3.52	3.61	2.08
NWUV 1489.a6	19.02	11.74	7.63	3.68	3.83	2.34
NWUV 1489.a7
NWUV 1489.a8	20.04	11.56	7.93	3.89	3.95
NWUV 1489.a10	16.58	9.72	6.7	3.37	3.82
NWUV 1489.a11		10.55	7.05	3.73
NWUV 1489.a12		12
NWUV 1489.a13
NWUV 1489.a14		11.39	7.35
NWUV 1489.a15			6.8
NWUV 1489.a16		10.09	6.46	3.48
NWUV 1489.a17		9.19	7.06	3.14		2.15
NWUV 1489.a18				3.96
NWUV 1489.a19		11.94		4.06
NWUV 1489.a20				3.37	3.34
NWUV 1489.b1				3.35	3.71
NWUV 1489.b2				3.74	3.89
NWUV 1489.b3				3.34
NWUV 1489.b4				3.58	3.79
NWUV 1489.b5				3.87
NWUV 1489.b6				3.5
NWUV 1489.b7				3.81
NWUV 1489.b8				3.21
* “Width of nasal” here refers to the distance between the two junctions of the nasal, premaxilla and frontal.

## Sheet: Suppl. Dataset 2
Supplementary dataset 2: Measurements of skulls of extant Tscherskia triton (mm)
Measured item Catalogue number	Palatal length	Upper diastema length	Length of the incisive foramen	Anterior palatal breadth	Posterior palatal breadth	Width of nasal*	Frontal suture length	Parietal suture length	Interparietal length	Interparietal width
志2号	14.84	8.73	5.48	2.73	2.48	2.13	9.81	6.7	3.26	8.25
志0324		9.49	6.35	2.84	2.91	2.21	9.65
志0512	16.34	9.23	6.1	3	2.95	2.25	10.86	6.04	3.97	8.91
志0526	15.99	9.28	6.31	2.87	2.79	2.23	9.63	6.21	2.94	8.28
016	13.72	7.68	4.97	2.58		2.11	8.83
彬017	14.02	7.7	5.41	2.39		2.41
018	14.42	8.09	5.21	2.58		2.2	9.13	5.97	3.62	8.59
021	14.23	7.64	4.81	2.63		2.22	9.34		2.7	8.18
126	18.79	11.12	6.83	3.1	3	2.59	12.09	6.1	4.37	8.05
127		9.52	5.28	3.11	2.92	2.53	9.63	5.48	4.08	8.7
133	18.31	10.68	6.64	3.49	3.43	2.31	10.94	5.86	4.7	10.04
158	15.83	8.92	5.49	3.11	3.11	2.69	9.87	5.41	4.39	10.03
086	17.87	10.57	6.66	3.21	3.02	2.11	11.11	6.99	3.49	8.87
礼096	16.6	9.41	6.51	3.08	3.22	2.58	9.7	6.06	3.23	9.2
礼097	16.53	9.59	6.41	3.22	3.17	2.68	10.29	6.11	3.88	8.64
0010	17.77	10.51	5.93	3.72	3.64	2.16	11.09	6.61	3.6	9.52
礼011			6.85			2.32	10.87	6.07	3.88	7.97
礼154		10.3	6.84	3.46	3.28	2.18	12.37	6.88	3.85	9.32
礼165	15.22	8.16	5.52	2.97	2.77	2.34	9.47	6.28	3.24	8.88
礼122	17.82	10.35	6.03	3.38	3.51	2.55	11.97	6.01	3.49	9.01
礼094	16.98	9.91	5.85	3.14	3.23	2	11.02	6.42	3.71	9.7
礼129		9.4
礼140	16.04	9.13	5.31	3.14	3.04	2.62	10.68	5.87	3.91	9.81
礼031	19.94	12.31	7.64	3.78	4.02	2.29	12.2	7.48	4.04	9.01
礼0341	16.68	9.71	6.36	3.12	2.89	2.45	9.97	6.55	4.06	7.7
054	17.44	10.01	6.27	3.25	3.3	2.17	11.1	6.03	3.96	8.36
齐026	18.67	11.26	7.4	3.42	3.36	2.66	11.09	6.64	3.7	9.74
齐027	19.79	11.84	6.97	3.48	3.65	2.62	11.06	6.62	3.95	9.42
齐028	20.13	12.13	7.66	3.22	3.36	2.99	12.13	6.73	4.33	9.9
齐031	18.73	10.85	7.04	3.31	3.26	2.76	10.61	6.26	4.86	9.76
齐034	19.6	11.92	7.58	3.69	3.75	3.31	12.62	7.49	4.15	9.93
齐036	19.07	11.05	7.3	3.34	3.38	2.96	11.73	6.24	6.16	9.37
040	17.28	9.94	6.2	3.08	3.1	2.39	11.16	6.99	3.55
齐042	16.49	9.42	5.57	2.97	2.95	2.03	9.5	7.38	3.59	8.64
045	18.21	10.68	6.24	3.18	3.31	2.69	11.26	6.66	4.97	9.88
齐046	17.73	10.61	6.48	3.55	3.28	2.01	11.58	6.27	3.77	10.47
052	17.09	9.51	5.82	3.16	3.41	2.48	11.07	6.92	3.69	9.87
齐060	16.03	9.03	5.24	2.96	2.95	2.7	9.79	5.33	4.03	8.96
齐070	18.97	11.32	7.1	3.23	3.22	2.67	10.69	6.98	3.82	9.95
025	15.7	9.24	6.08	3.18	3	2.28	10.06	5.89	3.5	8.58
030		10.27	6.91			2.43		5.98	3.3	9.52
057	18.29	10.93	7.4	3.19	3.15		10.86	6.09	3.5	8.42
001	19.45	11.41	6.78	3.55	3.58	2.52	11.68	6.71	4.21	9.53
026	17.42	10.16	7.38	3.29	3.16	2.71	9.85	6.03	4.29	8.71
038	18.68	10.66	6.99	3.76	3.34	2.89	10.01	6.57	3.71	8.75
dzx103	15.72	9.39	5.8	3.28	3.15	1.95	11.06	6.56	3.59
dzx105		9.79	6.92	3		2.27
* “Width of nasal” here refers to the distance between the two junctions of the nasal, premaxilla and frontal.

## Sheet: Suppl. Dataset 3
Supplementary dataset 3: Measurements of mandibles of Tscherskia triton varians of Syz 2 (mm)
Measured item Catalogue number	Lower diastema length	Depth of mandible under anterior edge of alveolus	Depth of mandible between two roots of m1	Depth of mandible between two roots of m1	Depth of mandible between two roots of m1	Depth of mandible under posterior edge of alveolus	Length of mandible from the condyle	Distance from coronion to gonion ventrale
NWUV 1489.e1		5.27	6.08	5.48	4.45	3.84
NWUV 1489.e2		3.81	4.93	4.48		3.04
NWUV 1489.e3		4.45	5.12	4.71	3.72	3.19
NWUV 1489.e4					3.57	3.29
NWUV 1489.e5			5.08	4.63	3.76	3.52
NWUV 1489.e6				4.48	3.56	3.33
NWUV 1489.e8			5.34	4.94	3.99	3.51
NWUV 1489.e9		3.92	4.9	4.47	3.6	3.19
NWUV 1489.e11		4.3	5.37	4.74	3.89
NWUV 1489.e12		4.12	5.01	4.56	3.68	3.25
NWUV 1489.e13		4.72	5.86	5.34	4.49	3.59
NWUV 1489.e14	5.78					3.08
NWUV 1489.e15		4.29	5.04	4.63	3.74	3.45
NWUV 1489.e16						3.33
NWUV 1489.e17						3.2
NWUV 1489.e18		4.47	5.48	5.05	3.96	3.53
NWUV 1489.e19		4.41	5.74	5.06	3.92	3.46
NWUV 1489.e20		4.19	5.13	4.78	4.1	3.66
NWUV 1489.e21				4.62	3.74	3.34
NWUV 1489.e23		4.34	5.35	4.84	3.99	3.34
NWUV 1489.e26		3.89	4.8	4.26	3.28	2.95
NWUV 1489.e27		4.11	5.01	4.46	3.46	3.18
NWUV 1489.e28		4.38	5.37	4.93	3.94	3.4
NWUV 1489.e29				5.19	4.26	3.7
NWUV 1489.e30	5.24
NWUV 1489.e31				4.75	3.88	3.35
NWUV 1489.e34					4.42	3.68
NWUV 1489.e35				4.61	3.68
NWUV 1489.e36					3.5	3.23
NWUV 1489.e37			4.43		3.22
NWUV 1489.e38		4.86	5.45	4.89	4.1	3.5
NWUV 1489.e39				4.57	3.6	3.36
NWUV 1489.e40		4.32	5.61	5.1	4.08	3.69
NWUV 1489.e41				5.09	4.22	3.78
NWUV 1489.e42		3.54	4.62	4.05	3.15	2.87
NWUV 1489.e44	6.7	5.13	6.37	6.05	4.9
NWUV 1489.e45					3.8	3.34
NWUV 1489.e46				4.63	3.62	3.05
NWUV 1489.e47				4.79	3.91	3.39
NWUV 1489.e48			5.11	4.62	3.65	3.22
NWUV 1489.e50					3.73	3.32
NWUV 1489.e51						2.89
NWUV 1489.e54						3.2
NWUV 1489.e55				4.47	3.53	3.07
NWUV 1489.e57						3.23
NWUV 1489.e59				4.17	3.24	2.9
NWUV 1489.e61					3.49	3.1
NWUV 1489.e62		4.75	5.78	5.33	4.46	3.72
NWUV 1489.e63			5.01	4.5	3.46
NWUV 1489.e65						3.68
NWUV 1489.e66						3.77
NWUV 1489.e67		4.21	5.17	4.47	3.64	2.97
NWUV 1489.e70					3.82	3.05
NWUV 1489.e71	5.61	4.2	4.81	4.35	3.43	3.09
NWUV 1489.e72						2.98
NWUV 1489.e73				4.87	4.04	3.53
NWUV 1489.e74			4.84	4.39	3.3	3.06
NWUV 1489.e75				5.76	4.98	4.21
NWUV 1489.e77		4.19	5.13	4.67	3.7	3.17
NWUV 1489.e78				4.55	3.8	3.19
NWUV 1489.e79		4.67	4.8	4.31	3.51	2.8
NWUV 1489.e80		4.61	5.83	5.14	4.16
NWUV 1489.e81			5.81	5.32	4.36	3.51
NWUV 1489.e82					3.39	3.03
NWUV 1489.e83				4.69	3.67	3.23
NWUV 1489.e85			4.74	4.33	3.35	2.98
NWUV 1489.e86			5.47	5.03	4.14	3.53
NWUV 1489.e87				4.81	3.78
NWUV 1489.e88	4.97
NWUV 1489.e90		4.97	5.25	4.77	3.78	3.47
NWUV 1489.e91				4.76
NWUV 1489.e92						3.59
NWUV 1489.e93		4.94	6.02	5.53	4.58	3.44
NWUV 1489.e94		4.62	5.17	4.78	3.93	3.32
NWUV 1489.e96					3.56	2.93
NWUV 1489.e112						3.33
NWUV 1489.e113				4.58	3.57	3.18
NWUV 1489.e115					4.03	3.44
NWUV 1489.e116				5.24	4.24	3.62
NWUV 1489.e117				4.78	3.85	3.45
NWUV 1489.e119						3.17
NWUV 1489.e121	5.53		5.75	5.23	4.3
NWUV 1489.e122	6.08	5.07		5.38	4.62	3.81
NWUV 1489.e124						3.76
NWUV 1489.e125					3.57	3.08
NWUV 1489.e127				5.43	4.34	3.65
NWUV 1489.e128				4.78	3.85	3.3
NWUV 1489.e129						3.13
NWUV 1489.e130				5.54	4.6	3.68
NWUV 1489.e131					4.8	4.05
NWUV 1489.e132					3.44	3.13
NWUV 1489.e133						3.25
NWUV 1489.e136						3.4
NWUV 1489.e141					4.04	3.68
NWUV 1489.e142						3.43
NWUV 1489.e144				5.11	4.17	3.64
NWUV 1489.e147	6.38				3.74	3.32
NWUV 1489.e149					4.02	3.36
NWUV 1489.e157						3.02
NWUV 1489.e158				4.68	3.86	3.34
NWUV 1489.e160						3.05
NWUV 1489.e164		4.49		4.89	3.92		20.38
NWUV 1489.e168				4.53	3.45	2.86
NWUV 1489.e169	6.66	6.52	6.63	5.63	4.77	4.02	24.09	13.13
NWUV 1489.f1				4.57	3.59	3.21
NWUV 1489.f2	6.05					2.99
NWUV 1489.f3	4.89	4.2	4.75	4.37	3.56	2.95
NWUV 1489.f5	6.3	4.99	5.91	5.39	4.33	3.66
NWUV 1489.f6	5.65	4.41	5.15	4.39	3.5	3.14
NWUV 1489.f9					3.16
NWUV 1489.f10		4.59	5.01	4.47	3.33	3.12
NWUV 1489.f11		4.25	4.96	4.65	3.74	3.35
NWUV 1489.f12					3.35	3.24
NWUV 1489.f13	5.08	3.97	4.9	4.46	3.47	3.18
NWUV 1489.f15		4.07	4.79	4.4	3.24	3.01
NWUV 1489.f19	5.24			4.61	3.87	3.37
NWUV 1489.f21				4.35		3.01
NWUV 1489.f22						3.07
NWUV 1489.f25		4.94		4.34		3.21
NWUV 1489.f26			5.16	4.77	3.83	3.47
NWUV 1489.f28				4.43	3.4	3.11
NWUV 1489.f29				4.45	3.54	3.05
NWUV 1489.f30					3.98	3.33
NWUV 1489.f31		3.65	4.43	4.28	3.48
NWUV 1489.f32				4.55	3.74	3.27
NWUV 1489.f33		4.02	5.11	4.72	3.87	3.3
NWUV 1489.f34		4.01	4.77	4.33	3.56	3.14
NWUV 1489.f36				4.8	3.73	3.36
NWUV 1489.f37				5.5	4.65	3.86
NWUV 1489.f38	5.28
NWUV 1489.f39				4.44	3.54	3.15
NWUV 1489.f40				5.06	4.21	3.7
NWUV 1489.f41		4.91	5.52	4.95	4.06	3.55
NWUV 1489.f42		4.18	5.29	4.87	4.01	3.45
NWUV 1489.f44	5.28	4.16	4.93	4.53	3.71	3.3
NWUV 1489.f45	5.7	4.51	5.29	4.81	4.08	3.53
NWUV 1489.f49						3.43
NWUV 1489.f50						3.2
NWUV 1489.f51		5.23	5.33	4.69	3.82	3.38
NWUV 1489.f53		4.06	5.3	4.88	4.11	3.61
NWUV 1489.f54						2.81
NWUV 1489.f56				4.4	3.56	2.89
NWUV 1489.f57				4.44	3.5	3.03
NWUV 1489.f58		5.23	6.2	5.81	4.78	4.01
NWUV 1489.f59	6.3	5.34	5.84	5.29	4.27	3.66
NWUV 1489.f60			5.29	4.72		3.27
NWUV 1489.f61				4.17	3.28	2.72
NWUV 1489.f62			4.57	4.17	3.34	2.93
NWUV 1489.f63			5.67	5.24	4.25	3.44
NWUV 1489.f64				5.57	4.6	3.93
NWUV 1489.f65				4.24	3.27
NWUV 1489.f66		4.82	5.63	5.04	4.14	3.17
NWUV 1489.f67				4.93	3.79	3.23
NWUV 1489.f69			5.47	5.08	4.19	3.41
NWUV 1489.f70		4.38	5.16	4.66	3.75	3.44
NWUV 1489.f71			5.88	5.28	4.21	3.42
NWUV 1489.f76				4.63	3.77	3.24
NWUV 1489.f77				5.66	4.91	3.89
NWUV 1489.f78				5.5	4.62	3.6
NWUV 1489.f80				4.35	3.26	2.92
NWUV 1489.f81			5.08	4.72	3.73	3.02
NWUV 1489.f82		4.21	4.85	4.33
NWUV 1489.f83		3.89	4.53	4.16	3.27	2.89
NWUV 1489.f84		4.43	5.45	4.83	3.79	2.97
NWUV 1489.f85		4.42		4.44
NWUV 1489.f86		4.43	5.21	4.58	3.55	3.19
NWUV 1489.f87				3.95		2.69
NWUV 1489.f88						2.42
NWUV 1489.f89		5.11	5.75	5.26
NWUV 1489.f95		4.55	5.57	5.12	4.2	3.49
NWUV 1489.f98						2.46
NWUV 1489.f99			4.31	3.93
NWUV 1489.f104		3.88	4.36	3.84	2.83	2.58
NWUV 1489.f106	6.6	5.28	6.22	5.68	4.78	3.86
NWUV 1489.f110		4.73	5.91	5.43	4.46	3.7
NWUV 1489.f111						3.48
NWUV 1489.f112		3.68		4.33	3.48	3.19
NWUV 1489.f113					3.9	3.42
NWUV 1489.f114					4.06	3.59
NWUV 1489.f117				4.46	3.71	3.22
NWUV 1489.f118					3.76	3.43
NWUV 1489.f119				4.78	3.99
NWUV 1489.f120					4.15	3.42
NWUV 1489.f123					3.14	3.12
NWUV 1489.f126						3.22
NWUV 1489.f127						3.62
NWUV 1489.f131					3.66	3.25
NWUV 1489.f133				4.15	3.44	2.93
NWUV 1489.f134						3.63
NWUV 1489.f136					3.61	3.06
NWUV 1489.f139					3.43	3.05
NWUV 1489.f140						3.55
NWUV 1489.f141				4.94	4.18
NWUV 1489.f144				5.08	4.25	3.73
NWUV 1489.f146				5.75	4.85
NWUV 1489.f148				4.66	3.67	3.43
NWUV 1489.f149				4.5	3.58	3.2
NWUV 1489.f150					3.85	3.56
NWUV 1489.f151				5.87	4.7	3.76
NWUV 1489.f152						4.02
NWUV 1489.f165				5.77	4.81	4.03
NWUV 1489.f166						3.93
NWUV 1489.f167	5.64	4.41		5.58		3.53
NWUV 1489.f168						3.43
NWUV 1489.f175			4.92	4.65	3.57	3.12
NWUV 1489.f176					4.34	3.82
NWUV 1489.f181				4.64	3.76	2.89
NWUV 1489.f184				4.37	3.32	2.87
NWUV 1489.f185					4.71	4.02
NWUV 1489.f187		4.19	5.1	4.59	3.75	3.14

## Sheet: Suppl. Dataset 4
Supplementary dataset 4: Measurements of mandibles of extant Tscherskia triton (mm) *
Measured item Catalogue number	Lower diastema length	Depth of mandible under anterior edge of alveolus	Depth of mandible between two roots of m1	Depth of mandible between two roots of m1	Depth of mandible between two roots of m1	Depth of mandible under posterior edge of alveolus	Length of mandible from the condyle	Distance from coronion to gonion ventrale
志2号	5.01	4.15	4.3	3.76	2.74	3.04	17.75	8.7
志0324	5.45	4.2	4.68	4.14	3.26	2.98	19.7	8.92
志0512	5.56	4.25	4.36	4.03	3.16	2.93	19.36	9.34
志0526	5.38	4.54	4.64	3.93	2.86	2.92	19.24	9.1
016	4.77	3.65	3.6	3.04		2.91	16.14
彬017	5.06	3.72	3.69	3.12		2.73	16.74
021	4.83	3.55	3.67	3.14		2.85	16.05	7.58
126	5.67	4.58	4.66	4.15	3.3	3.02	19.65
127	5.58	4.63	4.75	3.97	3.08	2.9	19.58
133	6.07	4.95	5.72	4.94	4.06	3.51	22.1
158	5.32	4.46	4.42	3.91	2.96	2.74	19.01	9.09
158（？）	5.64	4.71	4.79	4.04	3.2	3.05	20.12
086	6.06	4.87	5.08	4.58	3.62	3.07	20.95	9.81
0010	5.88	5.06	5.29	4.63	3.77	3.35	20.91	10.22
礼011	6.22	4.93	5.57	4.76	3.81	3.43	22.87	10.81
礼165	5.11	4.06	4.2	3.8	2.97	2.86	18.16	8.26
礼122	5.62	4.64	5.47	4.86	4.03	3.42	21.15	10.38
礼094	5.58	4.58	4.97	4.31	3.45	3.16	20.15	9.66
礼129	5.52	4.4	4.59	4.08	3.26	3.01	19.42	9.95
礼031	5.88	4.83	5.5	4.97	4.28	3.81	22.77	11.36
054	5.65	4.33	4.57	4.11	3.36	3.09	20.34	9.95
齐026	6.22	4.8	5.05	4.47	3.58	3.35	22.72	11.74
齐027		5.13	5.81	5.34	4.34	3.58	24.99	12.59
齐028	6.58	5.39	5.99	5.25	4.11	3.58	24.58	12.95
齐034		5.62	6.18	5.58	4.69	4.01		12.28
齐036	6.45	4.88	5.58	5.04	4.07	3.49	22.76	11.94
040	5.64	4.09	4.53	4.08	3.31	2.89	20.64	9.69
齐042	5.62	4.33	4.32	3.81	2.84	2.8	19.21
045	6.21	5.56	5.79	5.16	4.2	3.62	22.68	11.79
齐046	5.97	4.64	5.29	4.82	3.76	3.4	21.69	10.76
052	5.41	4.32	4.88	4.26	3.42	3.03	20.55	9.9
齐060	5.6	4.14	4.27	3.84	2.9	2.5	19.12	9.32
齐070	6.44	5.26	5.91	5.41	4.36	3.78	22.79	12.15
025	5.96	4.2	4.5	3.97	3.13	2.92	19.13
025(?)	5.09	4.27	4.44	3.92	3.03	2.71	18.82
038	6.06	4.43	5.56	5.15	4.4	3.62	22.22	10.37
017	5.6	4.11	4.13	3.57	2.78	2.4	18.94	8.89
dzx103	5.74	4.27	4.67	4.36	3.7	3.18	19.36
dzx104	5.54	4.14	4.41	3.96	3.16	2.78	19.06	9.16
* The right mandible of each specimen is selected for measuring.

## Sheet: Suppl. Dataset 5
Supplementary dataset 5: Measurements of upper molars of Tscherskia triton varians of Syz 2 (mm) *
Measured item Catalogue number	M1~3	M1		M2		M3
	L	L	W	L	W	L	W
NWUV 1489.a1	5.3	2.12	1.53	1.78	1.57	1.42	1.4
NWUV 1489.a2	5.65	2.42	1.58	1.95	1.63	1.42	1.41
NWUV 1489.a3				1.83
NWUV 1489.a4	5.37	2.34	1.54	1.81	1.57	1.38	1.38
NWUV 1489.a5	5.47	2.4	1.58	1.85	1.6	1.32	1.39
NWUV 1489.a6	5.35	2.38	1.62	1.78	1.66	1.36	1.39
NWUV 1489.a7			1.55
NWUV 1489.a8	5.57	2.36	1.59	1.89	1.6	1.51	1.48
NWUV 1489.a9	5.69	2.4	1.53	1.85	1.5	1.55	1.4
NWUV 1489.a10	5.05	2.21	1.4	1.76	1.44	1.21	1.27
NWUV 1489.a11		2.36	1.63
NWUV 1489.a12	5.68	2.44	1.58	1.84		1.5	1.45
NWUV 1489.a13		2.26	1.58	1.86	1.54
NWUV 1489.a14	5.51	2.36	1.55	1.81	1.53	1.43	1.34
NWUV 1489.a15	5.5	2.37	1.45	1.84	1.48	1.36	1.38
NWUV 1489.a16		2.35	1.53	1.9	1.59
NWUV 1489.a17		2.24	1.56
NWUV 1489.a18	5.56	2.36	1.6	1.91	1.62	1.48	1.45
NWUV 1489.a19		2.43	1.72	1.88	1.68
NWUV 1489.a20	5.36	2.37	1.55	1.81	1.49	1.38
NWUV 1489.a21	5.65	2.45	1.62	1.92	1.64	1.49	1.42
NWUV 1489.b1	5.62	2.35	1.54	1.82	1.56	1.49	1.46
NWUV 1489.b2	5.41	2.27	1.52	1.8	1.54	1.41	1.39
NWUV 1489.b3		2.32	1.47	1.85	1.54
NWUV 1489.b4	5.49	2.37	1.53	1.9	1.56	1.52	1.43
NWUV 1489.b5			1.7	2	1.71
NWUV 1489.b6		2.36	1.53	1.81	1.54
NWUV 1489.b7		2.49	1.57	1.9	1.57
NWUV 1489.b8		2.14
NWUV 1489.c1	5.31	2.33	1.55	1.91	1.55	1.32	1.4
NWUV 1489.c2	5.41	2.34	1.56	1.79	1.58	1.44	1.43
NWUV 1489.c3	5.39	2.33	1.52	1.83	1.51	1.45	1.41
NWUV 1489.c4	5.55	2.34	1.59	1.88	1.63	1.5	1.46
NWUV 1489.c5	5.55	2.38	1.65	1.93	1.62	1.5	1.47
NWUV 1489.c6	5.3	2.28	1.49	1.78	1.5	1.44	1.37
NWUV 1489.c7		2.38	1.52	1.92	1.6	1.51	1.43
NWUV 1489.c8	5.37	2.24	1.51	1.82	1.53	1.46	1.42
NWUV 1489.c9	5.6	2.37	1.5	1.89	1.54	1.45	1.4
NWUV 1489.c10	5.33	2.32	1.51	1.83	1.55	1.39	1.44
NWUV 1489.c11	5.5	2.49	1.64	1.96	1.64	1.32	1.4
NWUV 1489.c12	5.28	2.26	1.61	1.81	1.62	1.42	1.43
NWUV 1489.c13	5.6	2.37	1.49	1.84	1.47	1.41	1.41
NWUV 1489.c14	5.12	2.25	1.5	1.74	1.48	1.31	1.3
NWUV 1489.c15	5.42	2.32	1.51	1.72	1.54	1.46	1.37
NWUV 1489.c16	5.33	2.26	1.45	1.83	1.47	1.47	1.39
NWUV 1489.c17	5.35	2.3	1.51	1.76	1.51	1.46	1.37
NWUV 1489.c18	5.4	2.28		1.84		1.38	1.33
NWUV 1489.c19		2.39	1.61	1.91	1.57
NWUV 1489.c20		2.35	1.54	1.78	1.49
NWUV 1489.c21		2.38	1.66	1.95	1.62
NWUV 1489.c22		2.31	1.49	1.83	1.53
NWUV 1489.c23		2.32	1.59	1.93	1.6
NWUV 1489.c24		2.26	1.51	1.84	1.56
NWUV 1489.c25		2.3	1.6	1.8	1.58
NWUV 1489.c26		2.36	1.59	1.89	1.61
NWUV 1489.c27		2.32	1.6	1.86	1.64
NWUV 1489.c28		2.28	1.49	1.83	1.49
NWUV 1489.c29		2.39	1.63	1.95	1.53
NWUV 1489.c30		2.28	1.4	1.75	1.52
NWUV 1489.c31		2.38	1.62	1.9	1.6
NWUV 1489.c32		2.37	1.59	1.88	1.57
NWUV 1489.c33		2.47	1.59	1.91	1.58
NWUV 1489.c34		2.37	1.56		1.56
NWUV 1489.c35		2.35	1.57	1.93	1.56
NWUV 1489.c36		2.37	1.68		1.78
NWUV 1489.c37		2.21	1.44	1.79	1.52
NWUV 1489.c38		2.44	1.62	1.96	1.62
NWUV 1489.c39		2.25	1.5		1.54
NWUV 1489.c40		2.43	1.56	1.89	1.55
NWUV 1489.c41		2.42	1.62	1.76	1.57
NWUV 1489.c42		2.34	1.63	1.82	1.6
NWUV 1489.c43		2.25	1.54	1.85	1.57
NWUV 1489.c44		2.28	1.49	1.81	1.52
NWUV 1489.c45		2.23	1.49	1.77	1.54
NWUV 1489.c46		2.29	1.52	1.88	1.55
NWUV 1489.c47		2.36	1.59	1.91	1.65
NWUV 1489.c48		2.28	1.61	1.72	1.61
NWUV 1489.c49		2.17	1.46	1.69	1.49
NWUV 1489.c50			1.55	1.9	1.51	1.41	1.38
NWUV 1489.c51				1.93	1.62	1.55	1.48
NWUV 1489.c52				1.86	1.44	1.29	1.34
NWUV 1489.c53				1.84	1.47	1.49	1.43
NWUV 1489.c54					1.54	1.52	1.39
NWUV 1489.c55				1.86	1.47	1.42	1.35
NWUV 1489.c56				1.83	1.54	1.5	1.43
NWUV 1489.c57				1.89	1.53	1.53	1.4
NWUV 1489.c58				1.88	1.55	1.42	1.41
NWUV 1489.c59				1.86	1.65	1.41	1.43
NWUV 1489.c60				1.81	1.59	1.39	1.43
NWUV 1489.c61		2.31	1.57
NWUV 1489.c62		2.22	1.52
NWUV 1489.c63		2.34	1.6
NWUV 1489.c64		2.28	1.52
NWUV 1489.c65		2.35	1.65
NWUV 1489.c66		2.18	1.57
NWUV 1489.c67		2.29	1.57
NWUV 1489.c68		2.25	1.52
NWUV 1489.c69				1.93	1.58
NWUV 1489.c70				1.9	1.62
NWUV 1489.c71						1.53	1.37
* When a spencimen possesses both sides of molars, either the better preserved side is selected for measuring, or the measurements are composed of the measuremens of both sides of the molars by complementing each other.

## Sheet: Suppl. Dataset 6
Supplementary dataset 6: Measurements of upper molars of extant Tscherskia triton (mm) *
Measured item Catalogue number	M1~3	M1		M2		M3
	L	L	W	L	W	L	W
志2号	5.27	2.27	1.52	1.79	1.56	1.35	1.34
志0324	5.01	2.22	1.51	1.64	1.57	1.35	1.34
志0512	5.44	2.32	1.6	1.97	1.61	1.47	1.45
志0526	5.46	2.37	1.59	1.87	1.6	1.47	1.42
016		2.45	1.55	1.88	1.63
彬017		2.33	1.52	1.82	1.61
018		2.36	1.58	1.82	1.62
021		2.52	1.68	1.91	1.67
126	5.37	2.28	1.48	1.76	1.5	1.42	1.37
127	5.22	2.23	1.49	1.77	1.55	1.4	1.39
133	5.39	2.35	1.55	1.83	1.6	1.39	1.42
158	5.52	2.4	1.62	1.92	1.64	1.46	1.4
086	5.18	2.19	1.47	1.7	1.49	1.43	1.37
礼096	5.55	2.35	1.57	1.93	1.59	1.55	1.44
礼097	5.41	2.2	1.55	1.85	1.56	1.55	1.46
0010	5.44	2.31	1.53	1.9	1.59	1.52	1.42
礼011	5.29	2.32	1.46	1.78	1.54	1.34	1.32
礼154	5.19	2.29	1.56	1.79	1.56	1.32	1.43
礼165	5.5	2.42	1.58	1.91	1.56	1.39	1.42
礼122	5.34	2.26	1.52	1.85	1.57	1.51	1.44
礼094	5.28	2.25	1.57	1.75	1.63	1.4	1.41
礼129	5.47	2.33	1.5	1.87	1.58	1.52	1.41
礼140	5.35	2.33	1.61	1.86	1.65	1.4	1.42
礼031	5.41	2.31	1.57	1.77	1.64	1.53	1.44
礼0341	5.31	2.33	1.55	1.79	1.49	1.42	1.41
054	5.27	2.34	1.54	1.72	1.55	1.3	1.26
齐026	5.23	2.24	1.52	1.77	1.57	1.44	1.44
齐027	5.39	2.33	1.62	1.87	1.62	1.43	1.41
齐028	5.5	2.41	1.68	1.88	1.62	1.4	1.33
齐031	5.37	2.33	1.52	1.83	1.59	1.48	1.42
齐034	5.37	2.37	1.63	1.86	1.58	1.38	1.44
齐036	5.65	2.44	1.61	1.86	1.64	1.5	1.42
040	5.28	2.32	1.52	1.8	1.59	1.34	1.37
齐042	5.38	2.29	1.54	1.91	1.57	1.45	1.35
045	5.43	2.34	1.63	1.86	1.65	1.47	1.41
齐046	5.53	2.37	1.59	1.89	1.67	1.53	1.5
052	5.4	2.45	1.57	1.84	1.61	1.34	1.35
齐060	5.47	2.34	1.52	1.85	1.6	1.48	1.43
齐070	5.26	2.32	1.53	1.73	1.55	1.38	1.4
025	5.38	2.26	1.5	1.87	1.51	1.51	1.4
030		2.28	1.54	1.87	1.62
057	5.13	2.24	1.45	1.74	1.52	1.37	1.33
001	5.34	2.29	1.54	1.7	1.66	1.48	1.48
026	5.17	2.27	1.51	1.68	1.56	1.35	1.35
038	5.79	2.4	1.68	2	1.75	1.67	1.62
dzx103	5.11	2.18	1.45	1.74	1.47	1.36	1.39
dzx105	5.24	2.33	1.49	1.77	1.56	1.35	1.34
* The molars of left side of each specimen are selected for measuring.

## Sheet: Suppl. Dataset 7
Supplementary dataset 7: Measurements of lower molars of Tscherskia triton varians of Syz 2 (mm)
Measured item Catalogue number	m1~3	m1		m2		m3
	L	L	W	L	W	L	W
NWUV 1489.f1	5.8	2.19	1.31	1.84	1.6	1.86	1.48
NWUV 1489.f2	5.82	2.13	1.27	1.86	1.55	1.83	1.4
NWUV 1489.f3	5.56	2.14	1.29	1.8	1.52	1.74	1.39
NWUV 1489.f4	5.65	2.07	1.26	1.86	1.51	1.75	1.37
NWUV 1489.f5	5.84	2.17	1.32	1.85	1.53	1.82	1.43
NWUV 1489.f6	5.73	2.04	1.24	1.83	1.55	1.84	1.41
NWUV 1489.f7	5.84	2.15	1.26	1.84	1.55	1.85	1.43
NWUV 1489.f8	5.7	2.17	1.34	1.82	1.55	1.75	1.4
NWUV 1489.f9	5.85	2.13	1.3	1.87	1.62	1.9	1.43
NWUV 1489.f10	5.62	2.09	1.33	1.79	1.54	1.76	1.45
NWUV 1489.f11	5.57	2.11	1.32	1.82	1.55	1.7	1.39
NWUV 1489.f12	5.79	2.21	1.38	1.82	1.56	1.87	1.47
NWUV 1489.f13	5.48	2.07	1.32	1.74	1.54	1.74	1.46
NWUV 1489.f14	5.6	2.12	1.34	1.85	1.53	1.74	1.4
NWUV 1489.f15	5.64	2.08	1.27	1.82	1.51	1.81	1.39
NWUV 1489.f16	5.54	2.04	1.25	1.71	1.46	1.82	1.42
NWUV 1489.f17	5.48	2.18	1.27	1.76	1.44	1.65	1.33
NWUV 1489.f18	5.82	2.15	1.32	1.89	1.57	1.84	1.52
NWUV 1489.f19	5.72	2.17	1.26	1.88	1.56	1.78	1.46
NWUV 1489.f20	5.56	2.08	1.27	1.76	1.56	1.82	1.44
NWUV 1489.f21	5.98	2.24	1.37	1.92	1.65	1.92	1.56
NWUV 1489.f22	5.54	2.13	1.33	1.74	1.52	1.73	1.4
NWUV 1489.f23		2.1	1.36	1.82	1.52		1.41
NWUV 1489.f24	5.48	2.1	1.25	1.73	1.48	1.69	1.44
NWUV 1489.f25	5.62	2.16	1.26	1.79	1.5	1.73	1.39
NWUV 1489.f26	5.98	2.23	1.34	1.94	1.6	1.93	1.49
NWUV 1489.f27	5.69	2.14	1.26	1.84	1.55	1.81	1.42
NWUV 1489.f28	5.74	2.12	1.32	1.85	1.55	1.85	1.5
NWUV 1489.f29	5.51	2.14	1.34	1.79	1.51	1.68	1.37
NWUV 1489.f30	5.81	2.24	1.35	1.88	1.62	1.78	1.5
NWUV 1489.f31	5.49	2.11	1.27	1.73	1.48	1.76	1.34
NWUV 1489.f32	5.7	2.13	1.24	1.77	1.48	1.8	1.4
NWUV 1489.f33	5.67	2.18	1.35	1.87	1.58	1.77	1.4
NWUV 1489.f34	5.78	2.19	1.3	1.85	1.5	1.85	1.45
NWUV 1489.f35	5.82	2.09	1.35	1.78	1.47	1.78	1.27
NWUV 1489.f36	5.68	2.13	1.31	1.84	1.49	1.79	1.38
NWUV 1489.f37	5.73	2.12	1.4	1.85	1.61	1.83	1.51
NWUV 1489.f38	5.59	2.13	1.23	1.76	1.5	1.76	1.4
NWUV 1489.f39	5.53	2.11	1.28	1.69	1.49	1.73	1.37
NWUV 1489.f40	5.67	2.18	1.37	1.77	1.56	1.75	1.47
NWUV 1489.f41	5.44	2.09	1.3	1.71	1.55	1.75	1.36
NWUV 1489.f42	5.64	2.21	1.33	1.76	1.54	1.74	1.43
NWUV 1489.f43	5.56	2.11	1.3	1.76	1.57	1.76	1.39
NWUV 1489.f44	5.56	2.13		1.75	1.48	1.77	1.41
NWUV 1489.f45	5.54	2.15	1.35	1.77	1.5	1.67	1.33
NWUV 1489.f46	5.79	2.22	1.32	1.91	1.57	1.71	1.44
NWUV 1489.f47	5.6	2.07	1.33	1.77	1.51	1.84	1.49
NWUV 1489.f48	5.69	2.13	1.33	1.83	1.56	1.8	1.45
NWUV 1489.f49	5.4	2.09	1.28	1.78	1.48	1.69	1.41
NWUV 1489.f50		2.11	1.28	1.83	1.54
NWUV 1489.f51		2.19	1.42	1.79	1.57	1.75	1.45
NWUV 1489.f52		2.22	1.36	1.83	1.59	1.81
NWUV 1489.f53			1.34	1.78	1.53	1.75	1.47
NWUV 1489.f54			1.23	1.69	1.44	1.79	1.37
NWUV 1489.f55			1.25	1.72	1.54	1.73	1.45
NWUV 1489.f56	5.49	2.06	1.34	1.76	1.54	1.73	1.37
NWUV 1489.f57			1.31	1.82	1.55	1.8	1.48
NWUV 1489.f58			1.29	1.85	1.54
NWUV 1489.f59			1.3	1.78	1.53	1.66	1.38
NWUV 1489.f60	5.75	2.18	1.35	1.92	1.61	1.83	1.51
NWUV 1489.f61		2.17	1.29	1.83	1.57	1.84	1.45
NWUV 1489.f62	5.57	2.07	1.19	1.79	1.49	1.74	1.43
NWUV 1489.f63	5.85	2.27	1.43	1.84	1.65	1.76
NWUV 1489.f64	5.83	2.17	1.36	1.92	1.64	1.79	1.47
NWUV 1489.f65			1.36	1.78	1.58	1.8
NWUV 1489.f66	5.75	2.13	1.26		1.53		1.42
NWUV 1489.f67	5.72	2.14	1.3	1.93	1.51	1.8	1.46
NWUV 1489.f68		2.1	1.31		1.54
NWUV 1489.f69	5.65	2.11	1.29	1.74	1.48	1.83	1.45
NWUV 1489.f70			1.29	1.77	1.49	1.65	1.35
NWUV 1489.f71			1.37	1.81	1.56	1.77	1.54
NWUV 1489.f72		2.14	1.31	1.66	1.5
NWUV 1489.f74		2.12	1.35	1.82	1.54	1.85	1.39
NWUV 1489.f75		2.1	1.31	1.8	1.58	1.78	1.45
NWUV 1489.f76			1.28	1.77	1.5	1.76	1.42
NWUV 1489.f77		2.18	1.36		1.53	1.82	1.46
NWUV 1489.f78				1.69		1.88	1.42
NWUV 1489.f79			1.32	1.96	1.65	1.85	1.48
NWUV 1489.f80			1.3	1.8	1.49	1.74	1.42
NWUV 1489.f81				1.82	1.54	1.83	1.42
NWUV 1489.f82			1.39	1.94	1.7
NWUV 1489.f83		2.12	1.33	1.82	1.5
NWUV 1489.f84		2.13	1.29	1.73	1.53
NWUV 1489.f85		2.21	1.34	1.85	1.57
NWUV 1489.f86		2.17	1.31	1.85	1.54
NWUV 1489.f87			1.36	1.84	1.62
NWUV 1489.f88		2.13	1.29	1.83	1.5
NWUV 1489.f89		2.07	1.3	1.74	1.53
NWUV 1489.f90		2.09	1.3	1.77	1.55
NWUV 1489.f91		2.28	1.37	1.87	1.56
NWUV 1489.f92				1.82	1.58
NWUV 1489.f93		2.18	1.33	1.78	1.56
NWUV 1489.f94		2.16	1.26	1.81	1.48
NWUV 1489.f95		2.23	1.41	1.85
NWUV 1489.f96		2.13	1.33	1.77	1.54
NWUV 1489.f97		2.25	1.34	1.84	1.6
NWUV 1489.f98		1.97	1.19	1.65	1.39
NWUV 1489.f99		2.2	1.29	1.81	1.48
NWUV 1489.f100			1.34	1.86	1.57
NWUV 1489.f101		2.12	1.32	1.81	1.52
NWUV 1489.f102		2.14	1.31	1.78	1.5
NWUV 1489.f103		2.22	1.32	1.81	1.55
NWUV 1489.f104		2.17	1.27	1.83	1.47
NWUV 1489.f105			1.39	1.87	1.59
NWUV 1489.f106		2.18	1.36	1.84	1.61
NWUV 1489.f107		2.14	1.32	1.75	1.56
NWUV 1489.f108		2.11	1.3	1.7	1.48
NWUV 1489.f109		2.24	1.33	1.84	1.57
NWUV 1489.f110			1.32	1.79	1.55

## Sheet: Suppl. Dataset 8
Supplementary dataset 8: Measurements of lower molars of extant Tscherskia triton (mm) *
Measured item Catalogue number	m1~3	m1		m2		m3
	L	L	W	L	W	L	W
志2号	5.64	2.17	1.29	1.86	1.44	1.87	1.42
志0324	5.26	2.05	1.27	1.68	1.41	1.7	1.34
志0512	5.58	2.05	1.38	1.85	1.53	1.81	1.39
志0526	5.81	2.22	1.36	1.88	1.58	1.86	1.41
016		2.25	1.27	1.92	1.52
彬017		2.15	1.3	1.8	1.47
021		2.38	1.31	1.86	1.56
126	5.55	2.14	1.35	1.79	1.54	1.77	1.38
127	5.38	2.03	1.41	1.76	1.51	1.73	1.38
133	5.61	2.24	1.31	1.8	1.5	1.74	1.4
158	5.69	2.19	1.34	1.86	1.53	1.79	1.42
158(?)	5.65	2.19	1.38	1.85	1.59	1.81	1.45
086	5.29	1.95	1.27	1.7	1.44	1.76	1.35
0010	5.73	2.17	1.3	1.84	1.53	1.92	1.43
礼011	5.39	2.09	1.29	1.7	1.45	1.79	1.39
礼165	5.76	2.37	1.38	1.85	1.55	1.66	1.38
礼122	5.61	2.07	1.31	1.8	1.56	1.81	1.48
礼094	5.3	2.1	1.36	1.72	1.43	1.67	1.35
礼129	5.83	2.23	1.27	1.77	1.48	1.86	1.38
054	5.44	2.17	1.35	1.83	1.5	1.67	1.34
齐026	5.51	2.1	1.27	1.73	1.45	1.8	1.34
齐027	5.75	2.21	1.37	1.84	1.57	1.89	1.53
齐028	5.79	2.22	1.35	1.92	1.6	1.85	1.48
齐034	5.58	2.21	1.36	1.81	1.53	1.78	1.46
齐036	5.7	2.22	1.36	1.83	1.58	1.79	1.47
040	5.49	2.12	1.33	1.79	1.53	1.72	1.34
齐042	5.52	2.09	1.27	1.81	1.49	1.77	1.34
045	5.62	2.18	1.35	1.86	1.56	1.75	1.39
齐046	5.7	2.18	1.35	1.79	1.57	1.86	1.4
052	5.52	2.23	1.36	1.82	1.55	1.69	1.33
齐060	5.63	2.17	1.33	1.82	1.48	1.75	1.34
齐070	5.49	2.14	1.24	1.74	1.44	1.74	1.39
025	5.54	2.03	1.27	1.79	1.45	1.77	1.32
025（?）	5.62	2.16	1.29	1.78	1.52	1.78	1.37
038	5.86	2.2	1.35	1.94	1.63	1.99	1.58
017	5.71	2.16	1.31	1.84	1.48	1.84	1.37
dzx103	5.33	2.01		1.7	1.46	1.72	1.45
dzx104	5.55	2.16	1.27	1.77	1.47	1.76	1.35
dzx106	5.49	2.11	1.34	1.77	1.53	1.75	1.32
* Except for 礼094 and 齐046 whose molars of left side are selected for measuring, the molars of right side of other specimen are selected for measuring.
